# Supplementary figures and images for: Enantiomer-enriched π-extended helicenes with a perylene core from binaphthol: axial-to-helical chirality transfer with a stepwise Scholl reaction mechanism
Source: Royal Society of Chemistry journal article supplement (doi:10.1039/d5sc01498k), 2025-01-01

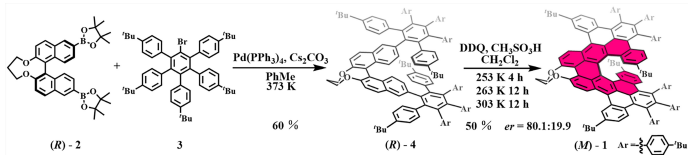

Supplement: d5sc01498k2.pdf [file d5sc01498k2.pdf]
